# Supplementary material
Source: PubMed Central journal article supplement (PMC5088716)
Supplement: NIHMS813984-supplement-1.pdf [file NIHMS813984-supplement-1.pdf]

Figure S1

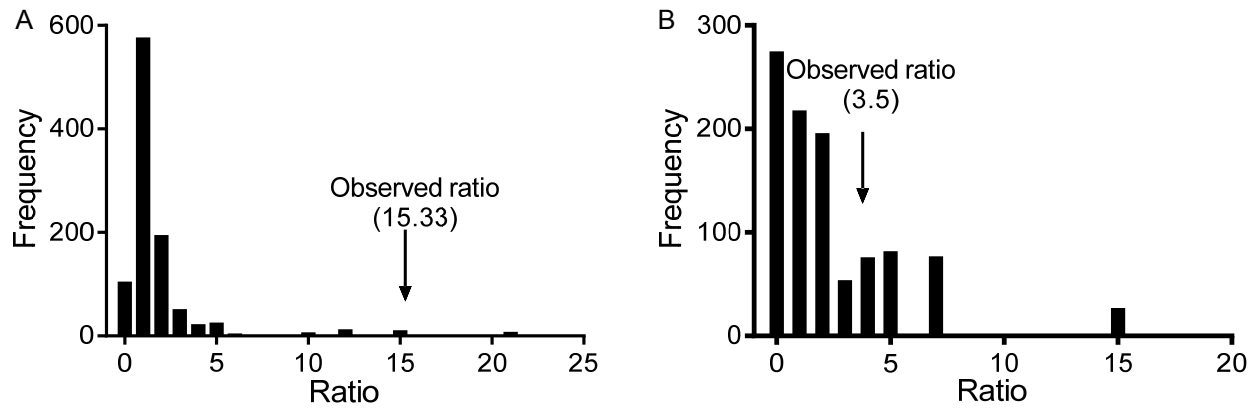

Figure S1. Difference in CNA and SNV enrichment between non-responders and responders to ipilimumab therapy, related to Figure 1. (A) The frequency of average total mutation (CNA + SNV) ratios between 12 non-responders and 4 responders in a total of 1,000 simulations. (B) The frequency of only SNV ratios between 12 non-responders and 4 responders.
