# Supplementary material
Source: PubMed Central journal article supplement (PMC5088716)
Supplement: NIHMS813984-supplement-2.pdf [file NIHMS813984-supplement-2.pdf]

Figure S2

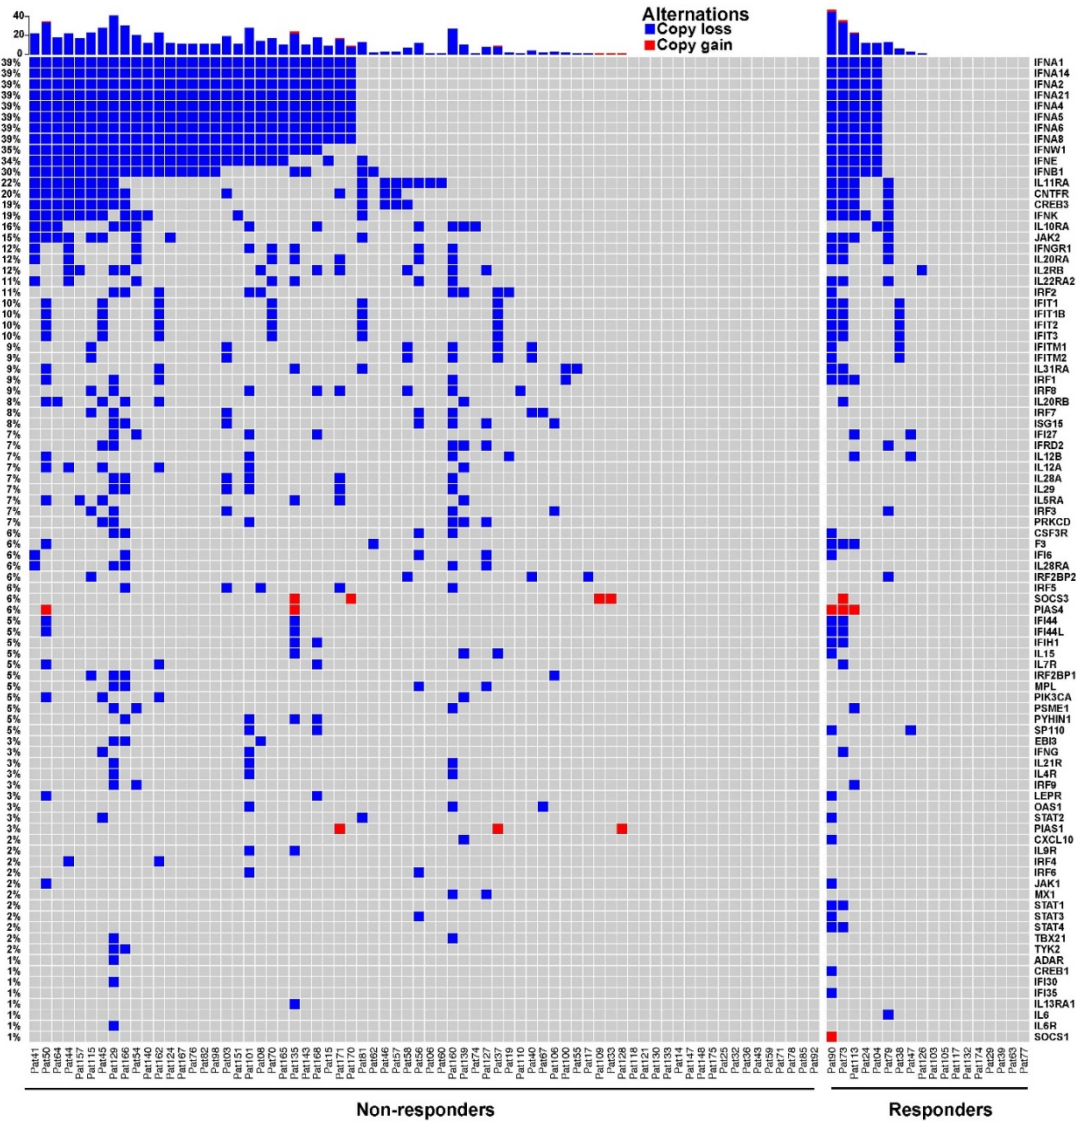

Figure S2. Landscape representation of CNAs of IFN- $\gamma$  pathway genes in melanoma tumors from non-responders and responders to ipilimumab of an independent dataset, related to Figure 1. Each column represents one sample. The bar graph at the top of the figure represents the total number of genes with CNAs in that specific sample. The numbers on the left side represent the percentage of melanoma samples carrying CNAs of each specific gene. Gene names are listed on the right.
