# Supplementary material
Source: PubMed Central journal article supplement (PMC5088716)
Supplement: NIHMS813984-supplement-3.pdf [file NIHMS813984-supplement-3.pdf]

Figure S3

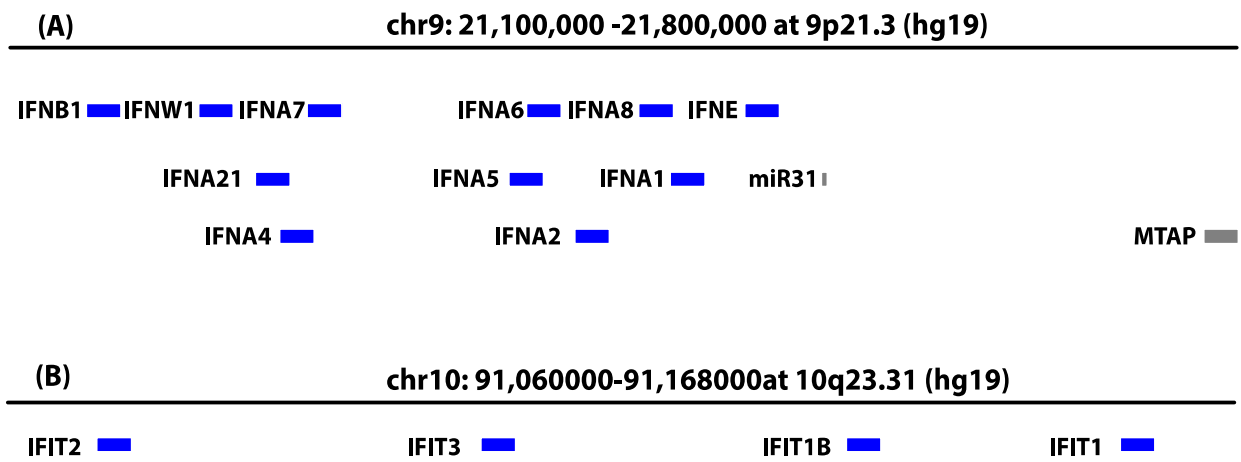

Figure S3. Two common interferon gene clusters deleted in ipilimumab non-responders, related to Figure 1&2. (A) The most frequent CNAs in ipilimumab non-responders located at chromosome 9p21.3, including IFN- $\alpha/\beta$  genes, MTAP, and miR31, etc. (B) The second frequent CNAs in ipilimumab non-responders located at chromosome 10q23.31, including IFIT1, 2, and 3, etc.
