# Supplementary material
Source: PubMed Central journal article supplement (PMC5088716)
Supplement: NIHMS813984-supplement-4.pdf [file NIHMS813984-supplement-4.pdf]

Figure S4

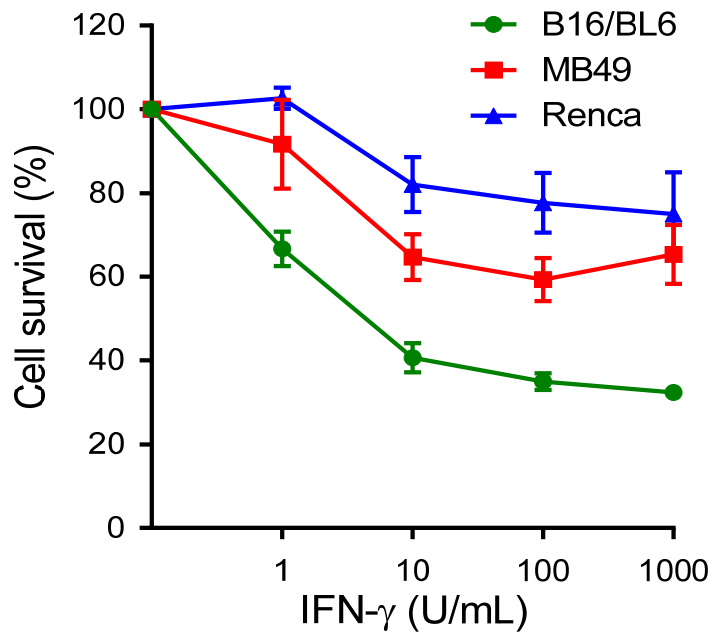

Figure S4. Responsiveness of mouse cancer cell lines B16/BL6, MB49, and Renca to IFN- $\gamma$  treatment, related to Figure 3. Tumor cells treated with varying concentrations of IFN- $\gamma$  for 48 h were assessed for their survivals.
