# Supplementary material
Source: PubMed Central journal article supplement (PMC5088716)
Supplement: NIHMS813984-supplement-5.pdf [file NIHMS813984-supplement-5.pdf]

Table S1. Patient clinical characteristics and clinical response, related to Figure 1

| ID | Sex | Age at treatment start | Treated (Y/N) | CR, PR, SD, PD | # of prior or concurrent therapies | Description of prior or concurrent therapies     |
|----|-----|------------------------|---------------|----------------|------------------------------------|--------------------------------------------------|
| 5  | F   | 47                     | Y             | PR             | 3                                  | CVD, interferon, dabrafenib                      |
| 6  | M   | 48                     | Y             | PD             | 1                                  | IL-2 (Adj)                                       |
| 7  | M   | 64                     | Y             | PD             | 1                                  | Temozolomide                                     |
| 9  | M   | 58                     | Y             | PD             | 2                                  | Dasatinib, temodar                               |
| 16 | M   | 34                     | Y             | PD             | 0                                  | NA                                               |
| 18 | F   | 66                     | Y             | PD             | 2                                  | Doxycycline, temodar                             |
| 22 | F   | 50                     | Y             | PR             | 0                                  | NA                                               |
| 23 | M   | 40                     | Y             | PD             | 0                                  | NA                                               |
| 24 | M   | 50                     | Y             | PD             | 0                                  | NA                                               |
| 25 | F   | 46                     | Y             | PD             | 4                                  | TLR, gp100 vaccine, high dose IL-2, temozolomide |
| 31 | F   | 71                     | Y             | PR             | 4                                  | Dacarbazine, trametinib, trientine, carboplatin  |
| 37 | M   | 82                     | Y             | PR             | 1                                  | Dacarbazine                                      |
| 46 | F   | 27                     | Y             | PD             | 3                                  | Ecorafenib, binimetinib, dabrafenib              |
| 47 | M   | 72                     | Y             | PD             | 2                                  | Temodar, doxycycline                             |
| 50 | M   | 68                     | Y             | PD             | 0                                  | NA                                               |
| 54 | M   | 28                     | Y             | PD             | 2                                  | Interferon (adj), temodar                        |

Abbreviation: CR, complete response; PR, partial response; SD, stable disease; PD, progression of disease; CVD, cyclophosphamide, vincristine, and dacarbazine; TLR, Toll like receptor; NA, not applicable.

Table S2. IFN- $\gamma$  pathway related genes, related to Figure 1

ADAR, CNTFR, CREB1, CREB3, CRLF2, CSF2RA, CSF3R, CXCL10, EBI3, F3, IFI16, IFI27, IFI30, IFI35, IFI44, IFI44L, IFI6, IFIH1, IFIT1, IFIT1B, IFIT2, IFIT3, IFITM1, IFITM2, IFNA1, IFNA14, IFNA2, IFNA21, IFNA4, IFNA5, IFNA6, IFNA8, IFNAR1, IFNAR2, IFNB1, IFNE, IFNG, IFNGR1, IFNGR2, IFNK, IFNW1, IFRD1, IFRD2, IL10RA, IL10RB, IL11RA, IL12A, IL12B, IL13RA1, IL15, IL20RA, IL20RB, IL21R, IL22RA2, IL28A, IL28RA, IL29, IL2RB, IL2RG, IL31RA, IL3RA, IL4R, IL5RA, IL6, IL6R, IL7R, IL9R, IRF1, IRF2, IRF2BP1, IRF2BP2, IRF3, IRF4, IRF5, IRF6, IRF7, IRF8, IRF9, IRGM, ISG15, JAK1, JAK2, LEPR, MPL, MX1, OAS1, PIAS1, PIAS4, PIK3CA, PRKCD, PSME1, PYHIN1, SOCS1, SOCS3, SP110, STAT1, STAT2, STAT3, STAT4, TBX21, TYK2

Table S3. Responders and non-responders to ipilimumab with exception of all SD patients in an independent cohort<sup>a</sup>, related to Figure 1.

|          | R   | NR    |
|----------|-----|-------|
| CNA      | 9   | 53    |
| WT       | 9   | 17    |
| Mutant % | 50% | 75.7% |

<sup>a</sup> Data were downloaded from published dataset by Van Allen et al. [Science; 350(6257): 207, 2015]  
Abbreviation: SD, stable disease; R, responder; NR, non-responder; CNA, copy number alteration;  
WT, wild-type.

Table S4. The log2 fold change of selected probes after IFN- $\gamma$  stimulation in each cell line, related to Figure 2.

| Probe                       | Gene   | C1   | C2   | C3   | C4   | C5    | C6   |
|-----------------------------|--------|------|------|------|------|-------|------|
| AFFX-HUMISGF3A/M97935_MA_at | STAT1  | 3.03 | 3.36 | 3.55 | 2.00 | 2.28  | 3.07 |
| AFFX-HUMISGF3A/M97935_5_at  | STAT1  | 3.22 | 3.29 | 3.58 | 1.99 | 2.56  | 3.13 |
| AFFX-HUMISGF3A/M97935_MB_at | STAT1  | 2.92 | 3.02 | 3.29 | 1.81 | 2.13  | 2.99 |
| 204747_at                   | IFIT3  | 2.99 | 3.15 | 3.14 | 1.98 | 2.47  | 2.23 |
| 219209_at                   | IFIH1  | 4.21 | 3.27 | 3.38 | 1.51 | 1.85  | 2.42 |
| AFFX-HUMISGF3A/M97935_3_at  | STAT1  | 2.69 | 2.46 | 2.83 | 1.58 | 1.76  | 2.43 |
| 200887_s_at                 | STAT1  | 2.64 | 2.38 | 2.65 | 1.57 | 1.87  | 2.48 |
| 214022_s_at                 | IFITM1 | 2.78 | 3.94 | 3.17 | 1.85 | 2.58  | 1.05 |
| 201601_x_at                 | IFITM1 | 2.60 | 3.57 | 2.80 | 1.98 | 1.84  | 1.01 |
| 204439_at                   | IFI44L | 2.78 | 3.21 | 4.10 | 2.97 | -0.27 | 1.50 |
| 209969_s_at                 | STAT1  | 3.60 | 3.81 | 4.33 | 2.33 | 2.90  | 3.57 |
| 205992_s_at                 | IL15   | 3.64 | 3.95 | 3.57 | 1.86 | 3.03  | 2.34 |
| 202531_at                   | IRF1   | 4.61 | 4.78 | 4.40 | 2.16 | 3.65  | 3.21 |
| 204533_at                   | CXCL10 | 4.90 | 6.71 | 6.45 | 2.67 | 4.4   | 5.46 |
| 201422_at                   | IFI30  | 2.21 | 2.60 | 1.54 | 0.44 | 0.43  | 0.96 |
| 1555464_at                  | IFIH1  | 1.95 | 2.17 | 2.46 | 0.22 | 1.15  | 0.56 |
| 208392_x_at                 | SP110  | 1.47 | 1.28 | 1.47 | 0.9  | 0.59  | 1.20 |
| 205170_at                   | STAT2  | 1.17 | 1.35 | 1.52 | 0.83 | 0.89  | 0.53 |
| 216020_at                   | IFIH1  | 1.91 | 1.47 | 1.91 | 0.58 | 0.60  | 0.81 |
| 232375_at                   | STAT1  | 1.51 | 1.70 | 1.95 | 0.88 | 1.22  | 1.63 |
| 205483_s_at                 | ISG15  | 1.62 | 1.99 | 1.67 | 0.64 | 1.47  | 1.13 |
| 202411_at                   | IFI27  | 1.65 | 2.29 | 1.87 | 0.21 | 0.99  | 1.51 |
| 223980_s_at                 | SP110  | 2.07 | 1.78 | 1.75 | 0.9  | 0.91  | 1.43 |
| 203153_at                   | IFIT1  | 2.24 | 1.87 | 1.38 | 0.88 | 1.37  | 1.48 |
| 217502_at                   | IFIT2  | 1.29 | 1.95 | 0.99 | 1.26 | 1.24  | 1.08 |
| 209417_s_at                 | IFI35  | 1.56 | 2.29 | 1.48 | 1.30 | 1.32  | 1.73 |
| 202086_at                   | MX1    | 1.69 | 2.30 | 2.40 | 1.47 | -0.42 | 1.06 |
| 225636_at                   | STAT2  | 2.01 | 1.92 | 2.09 | 1.23 | 1.78  | 1.17 |
| 202869_at                   | OAS1   | 1.72 | 2.25 | 2.25 | 0.81 | 1.70  | 0.91 |
| 205552_s_at                 | OAS1   | 2.08 | 2.59 | 2.17 | 1.22 | 2.18  | 0.69 |
| 217371_s_at                 | IL15   | 2.39 | 2.70 | 2.77 | 1.34 | 2.05  | 1.43 |
| 214453_s_at                 | IFI44  | 2.47 | 2.29 | 1.95 | 0.94 | 1.51  | 1.63 |
| 208012_x_at                 | SP110  | 2.57 | 2.23 | 1.75 | 1.07 | 1.36  | 1.43 |
| 209762_x_at                 | SP110  | 2.45 | 2.52 | 1.95 | 1.28 | 1.42  | 1.60 |
